# Supplementary material for: Hierarchical TiO2 Layers Prepared by Plasma Jets
Source: MDPI journal article supplement (doi:10.3390/nano11123254), 2021-11-30
Supplement: s1 [file s1]

# Hierarchical TiO<sub>2</sub> Layers Prepared by Plasma Jets

Radek Zouzelka <sup>1,\*</sup>, Jiri Olejnicek <sup>2</sup>, Petra Ksirova <sup>2</sup>, Zdenek Hubicka <sup>2</sup>, Jan Duchon <sup>2</sup>, Ivana Martiniakova <sup>1</sup>, Barbora Muzikova <sup>1</sup>, Martin Mergl <sup>1</sup>, Martin Kalbac <sup>1</sup>, Libor Brabec <sup>1</sup>, Milan Kocirik <sup>1</sup>, Monika Remzova <sup>1</sup>, Eva Vaneckova <sup>1</sup> and Jiri Rathousky <sup>1,\*</sup>

<sup>1</sup> J. Heyrovsky Institute of Physical Chemistry, Czech Academy of Sciences, Dolejskova 3, 182 23 Prague, Czech Republic; ivana.martiniakova@jh-inst.cas.cz (I.M.); barbora.muzikova@jh-inst.cas.cz (B.M.); martin.mergl@jh-inst.cas.cz (M.M.); martin.kalbac@jh-inst.cas.cz (M.Ka.); libor.brabec@jh-inst.cas.cz (L.B.); milan.kocirik@jh-inst.cas.cz (M.Ko.); monika.remzova@jh-inst.cas.cz (M.R.); eva.vaneckova@jh-inst.cas.cz (E.V.)

<sup>2</sup> Institute of Physics, Czech Academy of Sciences, Na Slovance 2, 182 21 Prague, Czech Republic; olejn@fzu.cz (J.O.); pnovotna@fzu.cz (P.K.); hubicka@fzu.cz (Z.H.); duchon@fzu.cz (J.D.)

\* Correspondence: radek.zouzelka@jh-inst.cas.cz (R.Z.); jiri.rathousky@jh-inst.cas.cz (J.R.); +420-266-05-34-04 (R.Z.); Tel.: +420-266-05-30-95 (J.R.)

## Geometry of interdigital electrodes (IDE) to DC measurements of TiO<sub>2</sub> layers

An interdigital electrode (IDE) system was used to collect electric characteristics of the TiO<sub>2</sub> films. TiO<sub>2</sub> film-IDE were fabricated by magnetron sputtering using shadow masking approach. The resulting device for measurements of electric characteristics is represented by a sandwich arrangement composed of support-TiO<sub>2</sub> film-IDE. IDE is attached to the TiO<sub>2</sub> film by the above fabrication procedure. A schematic representation of IDE geometry is shown in Figure S1.

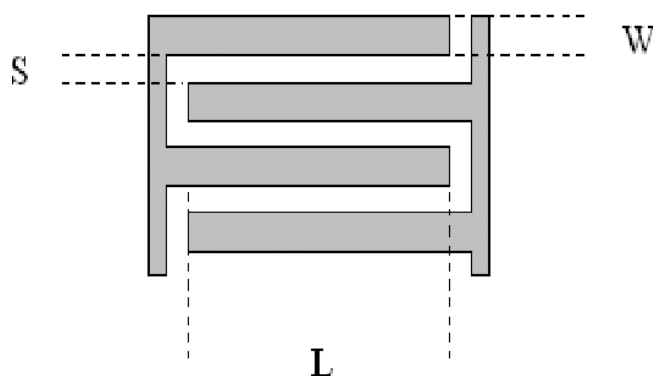

**Figure S1.** Schematic representation of IDE geometry;  $W$ ,  $S$  and  $L$  denotes the width of the electrode fingers, their separation and length of the fingers, respectively.

Preliminary tests of TiO<sub>2</sub> films-IDE sandwich have shown their relatively high surface resistivity. For this reason, the symmetrical IDE system was chosen with  $W = S = 20\ \mu\text{m}$  and  $L = 2\ \text{mm}$ . Grey areas represent the electrodes prepared by magnetron sputtering of Pt on supported TiO<sub>2</sub> layer. The thickness  $d$  of this Pt layer is of cca 100 nm. The thickness  $\delta$  of the intrinsic TiO<sub>2</sub> film is of about 7  $\mu\text{m}$ . The total electrodes/gaps ratio is 13/12. The total area of the IDE is 4.78 mm<sup>2</sup>. Based on conformal imaging relationships<sup>[1]</sup>. The theoretical value of the IDE capacity was determined to be of  $8.12 \cdot 10^{-13}\ \text{F}$ . The Pt electrodes of IDE are contacted with Kiethley 4200 SCS parameter analyser via gold probes (1  $\mu\text{m}$  tip radius).

## Reference

1. I. Thayne, K. Elgaid, G. Ternent, „Devices and fabrication technology“. Chapter 2, in I.D. Robertson, S. Lucyszyn (Eds.), RFIC and MMIC Design and Technology. IET, 2001, London, UK pp. 40-41
